# Supplementary material
Source: PubMed Central journal article supplement (PMC6008734)
Supplement: ic8b00271_si_001.pdf [file ic8b00271_si_001.pdf]

## Supplementary Information

**Hydride Conformers of the Nitrogenase FeMo-cofactor Two-Electron Reduced State E<sub>2</sub>(2H),**

**Assigned Using Cryogenic Intra-EPR-Cavity Photolysis**

Dmitriy A. Lukoyanov<sup>1</sup>, Nimesh Khadka<sup>2</sup>, Zhiyong Yang<sup>2</sup>,

Dennis R. Dean<sup>3</sup>, Lance C. Seefeldt<sup>2\*</sup>, Brian M. Hoffman<sup>1\*</sup>

<sup>1</sup>Departments of Chemistry and Molecular Biosciences, Northwestern University, Evanston, IL,  
60208

<sup>2</sup>Department of Chemistry and Biochemistry, Utah State University, Logan, UT 84322

<sup>3</sup>Department of Biochemistry, Virginia Polytechnic Institute and State University, Blacksburg,  
VA 24061.

\*Corresponding authors: Brian M. Hoffman, email [bmh@northwestern.edu](mailto:bmh@northwestern.edu), phone +1-847-491-  
3104; Lance C. Seefeldt, email [lance.seefeldt@usu.edu](mailto:lance.seefeldt@usu.edu), phone +1-435-797-3964.

Fig S1

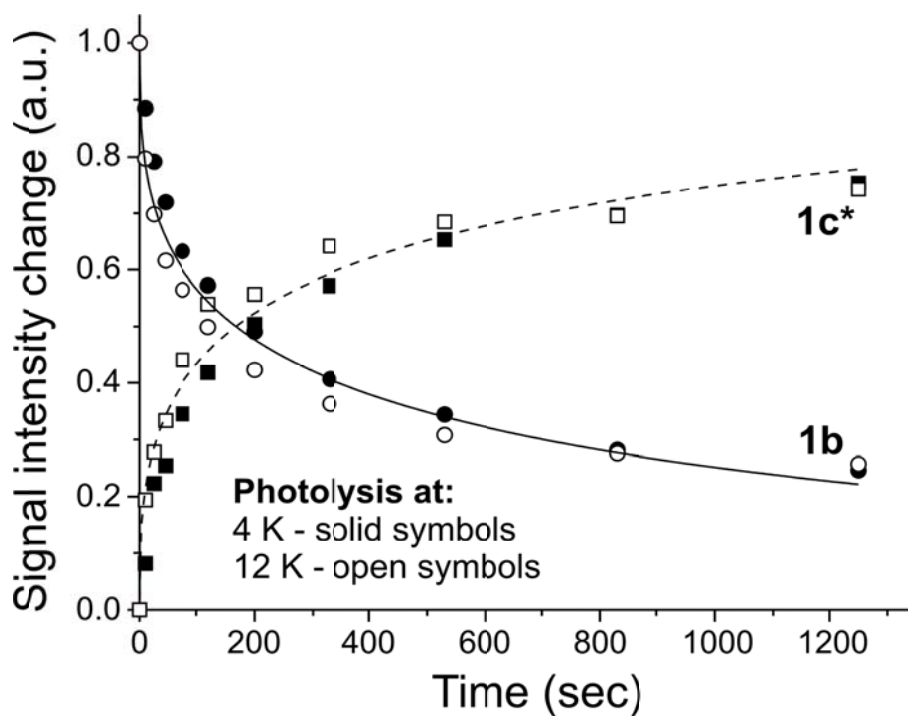

**Figure S1.** Time courses of EPR signals 1b and 1c\* during irradiation of WT Ar turnover in H<sub>2</sub>O with 450 nm laser diode light at 4 and 12 K. Solid line is fit of combined 4 and 12 K photolysis data points of 1b signal with stretched exponential  $\exp(-(t/\tau)^m)$  decay parameters  $\tau = 458$  sec,  $m = 0.40$ . Dotted line is  $[1 - 1b(t)]$ . *EPR conditions:* the same as described in Materials and Methods except for 12 K data points that were obtained from spectra recorded at 12 K with microwave power of 10 mW.
